# Supplementary material for: Switching at the ribosome: riboswitches need rProteins as modulators to regulate translation
Source: Springer Nature journal article supplement (doi:10.1038/s41467-021-25024-5), 2021-08-05
Supplement: MOESM3 [file 41467_2021_25024_MOESM3_ESM.pdf]

### **Description of Additional Supplementary Files**

File Name: Supplementary Data 1

Description: Modelled Structure of 30S bound adenine sensing riboswitch in ligand bound conformation
