# Supplementary material for: Switching at the ribosome: riboswitches need rProteins as modulators to regulate translation
Source: Nat Commun. 2021 Aug 5;12:4723. doi: 10.1038/s41467-021-25024-5 (PMC8342710; doi:10.1038/s41467-021-25024-5)
Supplement: Supplementary file 6 — Source Data [file 41467_2021_25024_MOESM6_ESM.xlsx]

## Sheet: Figure 2a
		1	2	3	4	5	6	7	Blank
	Ade [mM]	0	0.5	1	1.5	1.8	2	2
	sample 1	7226	14574	19093	18999	17732	21026	3141	3073
		7204	16219	19149	18838	18402	22532	3148	2973
		8222	16591	19272	21456	21263	20674	3111	2926
	sample 2	6538	14739	16544	15284	16374	20000	3143
		7184	15519	18940	18666	19893	22666	3099
		8025	17501	21360	23143	26838	23196	3167
	sample 3	6526	17737	18808	18305	20684	18698	3165
		7003	18027	19463	19029	19952	22947	2871
		7991	19286	19033	18777	21147	19556	2985
	For error estimation, three biological independent samples were measured in triplicates.

## Sheet: Figure 2b
							RAW DATA
							1	2	3	Blank
					eq S1	Mean
				(- Adenin)	DS1 0 eq	13688.7	15605	16415	14963	1972.33
				(+ Adenin)	DS1 0 eq	18331	20571	19550	20789	1972.33
				(- Adenin)	DS1 2,5 eq	18203.3	20197	19571	20759	1972.33
				(+ Adenin)	DS1 2,5 eq	26593	28634	27424	29638	1972.33
				(- Adenin)	DS1 5 eq	18830.3	19623	19988	22797	1972.33
				(+ Adenin)	DS1 5 eq	30142.7	31996	31524	32825	1972.33
				(+ Adenin)	70 S 0 eq	25879	27164	26607	29783	1972.33
					Negative ctrl	1972.33	2015	2014	1888
				For error estimation, one biological sample was measured in triplicates.

## Sheet: Supplementary Figure 2d
Lane		Volume (Int)				RAW	%	Error 10%
1	RNA only	8.10255e+06			1:1 free RNA	6.03467e+06	0.7646	0.0765
2	1to1	1.85758e+06			1:1	1.85758e+06	0.2354	0.0235
3	1to1 free RNA	6.03467e+06			1:2 free RNA	5.58337e+06	0.6619	0.0662
4	RNA only	1.10998e+07			1:2	2.85165e+06	0.3381	0.0338
5	1to2	2.85165e+06			1:4 free RNA	2.78764e+06	0.4504	0.045
6	1to2 free RNA	5.58337e+06			1:4	3.40141e+06	0.5496	0.055
7	RNA only	9.67788e+06			1:6 free RNA	2.25986e+06	0.3211	0.0321
8	1to4	3.40141e+06			1:6	4.77835e+06	0.6789	0.0679
9	1to4 free RNA	2.78764e+06			1:8 free RNA	2.23544e+06	0.2875	0.0288
10	RNA only	9.8665e+06			1:8	5.54125e+06	0.7125	0.0713
11	1to6	4.77835e+06			1:10 free RNA	1.15975e+06	0.1961	0.0196
12	1to6 free RNA	2.25986e+06			1:10	4.75388e+06	0.8039	0.0804
13	RNA only	1.01673e+07
14	1to8	5.54125e+06
15	1to8 free RNA	2.23544e+06
16	RNA only	8.74731e+06
17	1to10	4.75388e+06
18	1to10 free RNA	1.15975e+06

## Sheet: Supplementary Figure 3
MST	Four scans were recorded for each sample.
	X	Y	Error
30S apo	1.0986	0.0214	0.0402
	2.1973	0.028	0.0377
	4.3945	0.0217	0.0232
	8.7891	0.0144	0.0185
	17.5781	0.0499	0.0291
	35.1563	0.0732	0.0359
	70.3125	0.1507	0.0276
	140.625	0.2712	0.031
	281.25	0.3969	0.0331
	562.5	0.6838	0.0129
	1125	0.7971	0.0155
	2250	0.8907	0.0228
	4500	0.9547	0.0104
	9000	0.951	0.0222
	18000	0.9365	0.03
	36000	0.3562	0.0351
30S holo
	1.0986	0.0456	0.025
	2.1973	0.0266	0.0177
	4.3945	0.0432	0.0147
	8.7891	0.0607	0.0228
	17.5781	0.0692	0.0082786
	35.1563	0.1383	0.0113
	70.3125	0.2803	0.0182
	140.625	0.5092	0.0198
	281.25	0.6956	0.0191
	562.5	0.8523	0.0133
	1125	0.9102	0.0059312
	2250	0.9465	0.0162
	4500	0.9768	0.0087732
	9000	0.9833	0.017
	18000	0.9679	0.0216
	36000	0.9722	0.0090767
30SDeltaS1 apo
	0.946	-0.0105	0.032
	1.8921	0.0314	0.0259
	3.7842	-0.0015684	0.0088407
	7.5684	-0.0070537	0.0404
	15.1367	-0.0372	0.0235
	30.2734	-0.0261	0.0526
	60.5469	0.0236	0.0337
	121.094	0.0459	0.0154
	242.188	0.0572	0.0304
	484.375	0.164	0.0481
	968.75	0.1873	0.0341
	1937.5	0.369	0.0168
	3875	0.3853	0.0234
	7750	0.7425	0.0308
	15500	0.7449	0.0181
	31000	0.9065	0.0321
30SDeltaS1 holo
	0.946	-0.0056802	0.0287
	1.8921	-0.0048778	0.0238
	3.7842	0.0103	0.0404
	7.5684	-0.0126	0.0198
	15.1367	0.0043079	0.0283
	30.2734	0.0182	0.0288
	60.5469	0.0232	0.011
	121.094	0.0449	0.013
	242.188	0.1308	0.0136
	484.375	0.1726	0.0196
	968.75	0.2945	0.0181
	1937.5	0.4448	0.0482
	3875	0.6062	0.0426
	7750	0.8379	0.0265
	15500	0.8173	0.0212
	31000	0.9476	0.0117
30SDeltaS1 + vvS1
	0.0916	0.2525	0.0177
	0.1831	0.0646	0.1894
	0.3662	-0.077	0.1602
	0.7324	-0.0227	0.1355
	1.4648	0.0523	0.0484
	2.9297	0.0562	0.1034
	5.8594	-0.1181	0.0483
	11.7188	-0.045	0.1028
	23.4375	0.0098144	0.0485
	46.875	0.2722	0.2025
	93.75	0.1964	0.0339
	187.5	0.5798	0.0489
	375	0.7134	0.0263
	750	0.924	0.2424
	1500	0.8045	0.1358
	3000	0.926	0.0814
holo + 30DeltaS1 + vvS1
	0.9918	0.0126	0.0119
	1.9836	0.0145	0.0067132
	3.9673	0.0383	0.0145
	7.9346	0.0781	0.0141
	15.8691	0.1458	0.0088699
	31.7383	0.3476	0.003758
	63.4766	0.4486	0.0083456
	126.953	0.6145	0.0062315
	253.906	0.806	0.0083205
	507.812	0.8878	0.0046716
	1015.62	0.9498	0.0071533
	2031.25	0.9802	0.0113
	4062.5	0.9986	0.0077644
	8125	0.9917	0.0102
	16250	0.9809	0.0056424
	32500	0.7896	0.0679
holo + 30DeltaS1 + vvS1Delta6
	0.9918	0.0224	0.0203
	1.9836	0.0242	0.0182
	3.9673	0.0473	0.0258
	7.9346	0.0593	0.0098088
	15.8691	0.1224	0.0197
	31.7383	0.147	0.0308
	63.4766	0.3778	0.0076642
	126.953	0.5291	0.0304
	253.906	0.7421	0.0186
	507.812	0.8774	0.0257
	1015.62	0.9174	0.0122
	2031.25	0.9453	0.0040912
	4062.5	0.9687	0.0174
	8125	0.9924	0.0153
	16250	0.9742	0.0294
	32500	0.9365	0.0146
holo + 30DeltaS1 + vvS1Delta56
	0.9918	-0.0369	0.0162
	1.9836	-0.0186	0.0173
	3.9673	0.0139	0.0134
	7.9346	0.0477	0.0131
	15.8691	0.1339	0.0306
	31.7383	0.2039	0.0198
	63.4766	0.353	0.00926
	126.953	0.4328	0.0090891
	253.906	0.6033	0.0125
	507.812	0.7711	0.0042133
	1015.62	0.8618	0.024
	2031.25	0.9256	0.0167
	4062.5	0.9841	0.0101
	8125	1.0037	0.0083157
	16250	1.0036	0.0176
	32500	0.878	0.0265

## Sheet: Supplementary Figure 4
EMSAs
The RNP intensities were extracted from the gel with Image lab software and normalized to free RNA intensity. Error was calculated by integration of the noise by the same amount of pixels.
			rS1 [µM]	RNP	error
	rs1 + 127 apo		0	0.0169	0.0169
			0.5	0.0436	0.0169
			0.6667	0.0689	0.0169
			1	0.0796	0.0169
			2	0.1506	0.0169
			4	0.2816	0.0169
			8	0.3471	0.0169
			16	0.4491	0.0169
			24	0.448	0.0169
			32	0.4543	0.0169
			40	0.4674	0.0169
			60	0.4637	0.0169
	rs1 + 127 holo
			0	0.0337	0.0215
			0.5	0.0994	0.0215
			0.6667	0.1476	0.0215
			1	0.1878	0.0215
			2	0.2744	0.0215
			4	0.3418	0.0215
			8	0.3762	0.0215
			16	0.3822	0.0215
			24	0.4016	0.0215
			32	0.402	0.0215
			40	0.409	0.0215
			60	0.4114	0.0215

## Sheet: Supplementary Figure 6
NMR
127 apo (RNA only)
			Assignment	w1	w2	Data Height	S/N
	apo
		U16apoB	U16apoB	162.318	13.857	138356736	82
		U17apoB	U17apoB	159.203	12.026	49843312	30
		G38apoB	G38apoB	148.042	12.595	70115576	42
		G44apoB	G44apoB	143.552	10.508	55549184	33
		G46apoB	G46apoB	149.02	13.59	53450140	32
		U47apoB	U47apoB	159.032	12.021	49870368	30
		G59apoB	G59apoB	148.353	13.219	30962080	18
		G72apoB	G72apoB	147.115	11.794	39247584	23
	P1	U16	U16	163.673	14.106	77931600	46
		U17	U17	163.132	13.687	30681832	18
		U77	U77	162.375	13.292	41072316	24
		G78	G78	146.768	11.604	22335492	13
	P2	U28	U28	158.209	11.496	61843100	37
		U31	U31	156.355	10.506	40921880	24
		U39	U39	158.261	10.874	47812040	28
		U40	U40	163.835	14.488	39561252	24
		U41	U41	163.729	13.014	29726624	18
		G42	G42	143.016	9.973	29900184	18
		G43	G43	147.737	12.494	33690208	20
		G44	G44	147.735	12.148	29561848	18
	L/J	G37	G37	148.646	13.06	21158254	13
		G38	G38	148.043	13.356	10826013	6
	P3	G57	G57	147.293	12.34	107376488	64
		G59	G59	149.572	13.247	26618654	16
		U68	U68	163.124	14.114	153789824	92
		U70	U70	162.837	13.857	193751472	115
		U71	U71	162.762	13.185	79685720	47
	P4	G81	G81	148.513	13.19	114244440	68
		U82	U82	163.287	14.275	61876512	37
		G115	G115	147.477	12.744	46404336	28
	P5	U90	U90	162.16	13.824	87928424	52
		U91	U91	162.763	13.553	107456480	64
		U92	U92	162.292	12.86	74576192	44
		G110	G110	146.972	12.392	27205504	16
	holo	G43holo	G43holo	147.552	12.433	20642976	12
		G46holo	G46holo	150.868	12.879	0	0
		U47holo	U47holo	158.964	10.795	0	1
		U49holo	U49holo	160.353	10.482	0	0
		G72holo	G72holo	148.013	11.496	0	0
		U75holo	U75holo	163.551	13.835	0	2
		G78holo	G78holo	146.47	11.546	0	2
127 apo + 30S deltaS1
			Assignment	w1	w2	Data Height	S/N
	apo
		U16apoB	U16apoB	162.318	13.857	70275400	35
		U17apoB	U17apoB	159.203	12.026	28397064	14
		G38apoB	G38apoB	148.077	12.598	27241332	14
		G44apoB	G44apoB	143.523	10.507	22779898	11
		G46apoB	G46apoB	149.036	13.585	27142444	14
		U47apoB	U47apoB	159.032	12.021	27354128	14
		G59apoB	G59apoB	148.353	13.219	15262564	8
			G72apoB	147.08	11.785	18514240	9
	P1	U16	U16	163.673	14.106	51791104	26
		U17	U17	163.153	13.688	17726432	9
		U77	U77	162.446	13.282	24118714	12
		G78	G78	146.712	11.609	16783728	8
	P2	U28	U28	158.209	11.496	41050204	21
		U31	U31	156.359	10.505	26717446	13
		U39	U39	158.281	10.874	27457856	14
		U40	U40	163.796	14.487	26485108	13
		U41	U41	163.622	13.013	18813124	9
		G42	G42	142.976	9.978	16522964	8
		G43	G43	147.773	12.49	20271080	10
		G44	G44	147.716	12.14	16882712	8
	L/J	G37	G37	148.654	13.062	12481786	6
		G38	G38	148.076	13.36	11207761	6
	P3	G57	G57	147.274	12.338	61417304	31
		G59	G59	149.539	13.245	14079777	7
		U68	U68	163.124	14.114	84191560	42
		U70	U70	162.837	13.857	100200320	50
		U71	U71	162.73	13.178	40487316	20
	P4	G81	G81	148.494	13.189	61336260	31
		U82	U82	163.255	14.269	21128526	11
		G115	G115	147.445	12.731	13779462	7
	P5	U90	U90	162.16	13.824	45910040	23
		U91	U91	162.742	13.548	36522720	18
		U92	U92	162.255	12.849	22972724	12
		G110	G110	146.972	12.392	14467161	7
	holo	G43holo	G43holo	147.552	12.433	0	4
		G46holo	G46holo	150.868	12.879	0	1
		U47holo	U47holo	158.964	10.795	0	0
		U49holo	U49holo	160.353	10.482	0	1
		G72holo	G72holo	148.013	11.496	0	0
		U75holo	U75holo	163.551	13.835	0	1
		G78holo	G78holo	146.47	11.546	0	2
127 apo + 30S
			Assignment	w1	w2	Data Height	S/N
	apo
		U16apoB	U16apoB	162.318	13.857	69006424	31
		U17apoB	U17apoB	159.653	12.04	16912480	8
		G38apoB	G38apoB	147.801	12.589	23535496	11
		G44apoB	G44apoB	143.552	10.508	0	0
		G46apoB	G46apoB	148.771	13.577	31483552	14
		U47apoB	U47apoB	159.653	12.04	16912480	8
		G59apoB	G59apoB	148.353	13.219	14496365	7
			G72apoB	147.034	11.804	23490424	11
	P1	U16	U16	163.673	14.106	69886048	32
		U17	U17	163.155	13.682	45764412	21
		U77	U77	162.384	13.301	45816056	21
		G78	G78	146.51	11.611	31162356	14
	P2	U28	U28	158.139	11.499	84933664	38
		U31	U31	156.305	10.515	47951932	22
		U39	U39	158.243	10.879	59506932	27
		U40	U40	163.901	14.494	60177072	27
		U41	U41	163.704	13.011	43307552	20
		G42	G42	142.775	9.981	53589316	24
		G43	G43	147.516	12.488	26988170	12
		G44	G44	147.57	12.147	33771420	15
	L/J	G37	G37	148.593	13.07	27994876	13
		G38	G38	147.928	13.36	19734448	9
	P3	G57	G57	146.975	12.335	37515868	17
		G59	G59	149.475	13.25	25925040	12
		U68	U68	163.124	14.114	69902984	32
		U70	U70	162.837	13.857	84603704	38
		U71	U71	162.841	13.178	27552992	12
	P4	G81	G81	148.513	13.19	40329160	18
		U82	U82	163.287	14.275	12016270	5
		G115	G115	147.491	12.742	16299122	7
	P5	U90	U90	162.16	13.824	30277570	14
		U91	U91	162.763	13.553	0	4
		U92	U92	162.279	12.879	18142238	8
		G110	G110	146.972	12.392	30740624	14
	holo	G43holo	G43holo	147.552	12.433	13077592	6
		G46holo	G46holo	150.868	12.879	0	2
		U47holo	U47holo	158.964	10.795	0	0
		U49holo	U49holo	160.183	10.484	17174542	8
		G72holo	G72holo	148.013	11.496	0	0
		U75holo	U75holo	163.551	13.835	12544468	6
		G78holo	G78holo	146.47	11.546	11702958	5
127 holo (RNA only)
			Assignment	w1	w2	Data Height	S/N
	apo	U17apoB	U17apoB	159.307	12.028	15421280	8
		G38apoB	G38apoB	148.062	12.599	34433176	17
		G44apoB	G44apoB	143.627	10.513	18604766	9
		G46apoB	G46apoB	148.988	13.564	32661876	16
		U47apoB	U47apoB	159.029	12.036	15487699	8
	P1	U16	U16	162.994	14.031	57854680	29
		U17	U17	163.133	13.659	64410504	32
		U20	U20	162.297	13.953	32729222	16
		U77	U77	162.363	13.28	63784672	32
		G78	G78	146.409	11.537	47802304	24
	P2	U25	U25	164.4	13.785	77396760	39
		U28	U28	158.117	11.477	127119328	64
		U31	U31	156.453	10.581	128998584	65
		U39	U39	158.279	10.832	126088984	63
		U40	U40	163.934	14.49	87030640	44
		U41	U41	163.649	13.001	76350960	38
		G42	G42	143.006	9.996	68011864	34
		G43	G43	147.574	12.441	72794600	36
		G44	G44	147.681	12.145	54307776	27
	L/J	U22	U22	163.488	13.293	26291978	13
		U34	U34	164.134	13.792	61984136	31
		G37	G37	148.847	13.074	35476424	18
		G38	G38	148.237	13.389	29371780	15
		G46	G46	150.953	12.885	30577828	15
		U47	U47	158.879	10.799	79820704	40
		U49	U49	160.371	10.476	60900824	30
		U51	U51	163.813	13.551	84161328	42
		U74	U74	163.058	14.094	85788080	43
		U75	U75	163.586	13.853	49974860	25
	P3	G57	G57	146.959	12.44	55979048	28
		G59	G59	149.743	13.266	45125952	23
		U68	U68	163.438	14.11	149341584	75
		U70	U70	162.743	13.95	53702040	27
		G72	G72	147.943	11.491	38093516	19
	P4	U82	U82	163.352	14.279	38910624	19
		G115	G115	147.584	12.748	32073850	16
	P5	U90	U90	162.75	13.853	117668504	59
		U91	U91	163.184	13.567	73030816	37
		U92	U92	162.318	12.864	64765340	32
		G110	G110	147.355	12.346	71438840	36
127 holo + 30SDeltaS1
			Assignment	w1	w2	Data Height	S/N
	apo	U17apoB	U17apoB	159.777	11.959	0	2
		G38apoB	G38apoB	148.532	12.53	0	3
		G44apoB	G44apoB	144.097	10.443	0	2
		G46apoB	G46apoB	149.461	13.492	24177436	13
		U47apoB	U47apoB	159.498	11.966	0	0
	P1	U16	U16	163.463	13.962	31482378	17
		U17	U17	163.476	13.587	46285696	24
		U20	U20	162.766	13.884	22846576	12
		U77	U77	162.746	13.201	41407060	22
		G78	G78	146.925	11.466	48055680	25
	P2	U25	U25	164.869	13.716	60112432	32
		U28	U28	158.587	11.408	93815672	49
		U31	U31	156.922	10.512	94470216	50
		U39	U39	158.749	10.763	98980104	52
		U40	U40	164.366	14.418	61961892	32
		U41	U41	164.061	12.928	48818560	26
		G42	G42	143.481	9.927	54699104	29
		G43	G43	148.043	12.372	58203320	31
		G44	G44	148.151	12.076	48273704	25
	L/J	U22	U22	163.917	13.212	16649442	9
		U34	U34	164.603	13.723	53892704	28
		G37	G37	149.243	13.002	27927340	15
		G38	G38	148.651	13.318	23630848	12
		G46	G46	151.432	12.812	26884172	14
		U47	U47	159.348	10.73	63465220	33
		U49	U49	160.84	10.406	41151156	22
		U51	U51	164.271	13.478	64820144	34
		U74	U74	163.527	14.025	57895440	30
		U75	U75	163.926	13.774	48722908	26
	P3	G57	G57	147.428	12.371	50548708	26
		G59	G59	150.211	13.197	36976596	19
		U68	U68	163.907	14.041	80490288	42
		U70	U70	163.212	13.881	35343876	19
		G72	G72	148.481	11.42	33884640	18
	P4	U82	U82	163.821	14.21	0	2
		G115	G115	148.053	12.678	0	3
	P5	U90	U90	163.22	13.784	34697608	18
		U91	U91	163.578	13.511	11134889	6
		U92	U92	162.787	12.794	11629112	6
		G110	G110	147.824	12.276	23905680	13
127 holo + 30S
			Assignment	w1	w2	Data Height	S/N
	apo	U17apoB	U17apoB	159.307	12.028	0	0
		G38apoB	G38apoB	148.062	12.599	0	4
		G44apoB	G44apoB	143.627	10.513	0	0
		G46apoB	G46apoB	149.004	13.569	39770116	16
		U47apoB	U47apoB	159.029	12.036	0	1
	P1	U16	U16	162.72	14.008	61937880	25
		U17	U17	163.008	13.658	75843352	31
		U20	U20	162.253	13.936	37828820	15
		U77	U77	162.211	13.274	58385000	24
		G78	G78	146.409	11.537	58601480	24
	P2	U25	U25	164.4	13.785	75330568	31
		U28	U28	158.019	11.473	134548384	55
		U31	U31	156.381	10.579	119788248	49
		U39	U39	158.203	10.829	126604152	52
		U40	U40	163.84	14.486	78704032	32
		U41	U41	163.53	12.997	70705176	29
		G42	G42	143.003	9.995	70369976	29
		G43	G43	147.574	12.441	59473140	24
		G44	G44	147.663	12.139	58627328	24
	L/J	U22	U22	163.444	13.28	27953780	11
		U34	U34	164.134	13.792	66340980	27
		G37	G37	148.776	13.067	43170816	18
		G38	G38	148.15	13.384	23856760	10
		G46	G46	150.875	12.885	30823176	13
		U47	U47	158.837	10.788	78892752	32
		U49	U49	160.321	10.474	58027200	24
		U51	U51	163.802	13.549	87097688	36
		U74	G72	147.949	11.489	55153960	23
		U75	U75	163.463	13.842	70515056	29
	P3	G57	G57	146.959	12.44	67864592	28
		G59	G59	149.686	13.265	57558308	23
		U68	U68	163.469	14.102	100555112	41
		U70	U70	162.678	13.929	73976160	30
		G72	G72	147.949	11.489	55153960	23
	P4	U82	U82	163.352	14.279	0	3
		G115	G115	147.355	12.74	0	2
	P5	U90	U90	162.75	13.853	25871534	11
		U91	U91	163.047	13.564	0	4
		U92	U92	162.318	12.864	0	1
		G110	G110	147.355	12.328	0	4
127 holo + rS1
			Assignment	w1	w2	Data Height	S/N
	apo	G38apoB	G38apoB	148.698	12.541	18780896	4
		G44apoB	G44apoB	144.074	10.447	22339148	4
		G46apoB	G46apoB	149.514	13.498	86552576	17
	P1	U16	U16	163.264	13.969	92339888	18
		U17	U17	163.609	13.594	153646576	30
		U20	U20	162.766	13.884	34691128	7
		U77	U77	162.798	13.211	152222352	29
		G78	G78	146.934	11.476	138445088	27
	P2	U25	U25	164.891	13.727	158586064	30
		U28	U28	158.613	11.416	320683744	62
		U31	U31	156.962	10.522	306001024	59
		U39	U39	158.772	10.772	328818720	63
		U40	U40	164.436	14.428	202910032	39
		U41	U41	164.12	12.939	158083328	30
		G42	G42	143.497	9.937	171026848	33
		G43	G43	148.043	12.372	145018816	28
		G44	G44	148.162	12.083	127482264	24
	L/J	U22	U22	163.979	13.226	85787888	16
		U34	U34	164.603	13.723	92277416	18
		G37	G37	149.305	13.013	85939112	17
		G38	G38	148.684	13.328	64497040	12
		G46	G46	151.452	12.823	72106912	14
		U47	U47	159.473	10.735	219813808	42
		U49	U49	160.845	10.417	153509568	29
		U51	U51	164.375	13.49	215373904	41
		U74	U74	163.527	14.025	117321040	23
		U75	U75	164.094	13.78	139506336	27
	P3	G57	G57	147.408	12.388	109101576	21
		G59	G59	150.226	13.204	113693984	22
		U68	U68	164.052	14.051	186064704	36
		U70	U70	163.212	13.881	157958336	30
		G72	G72	148.491	11.436	109825096	21
	P4	U82	U82	163.818	14.215	51118200	10
		G115	G115	147.963	12.686	25137910	5
	P5	U90	U90	163.175	13.796	132757672	26
		U91	U91	163.245	13.504	78632576	15
		U92	U92	162.765	12.8	65253488	13
		G110	G110	147.817	12.283	54599960	10
127 apo + rS1
			Assignment	w1	w2	Data Height	S/N
		G14apoB
		U16apoB	U16apoB	162.848	13.801	114506352	20
		U17apoB	U17apoB	159.772	11.984	72347968	13
		G38apoB	G38apoB	148.629	12.541	81284912	14
		G44apoB	G44apoB	144.098	10.45	98413792	17
		G46apoB	G46apoB	149.544	13.532	101567008	18
		U47apoB	U47apoB	159.407	11.977	27664344	5
		G59apoB	G59apoB	148.883	13.163	42568440	7
			G72apoB	147.631	11.744	64710500	11
		U16	U16	163.888	14.035	116649784	20
		U17	U17	163.66	13.635	64238144	11
		U77	U77	162.887	13.239	86172136	15
		G78	G78	147.059	11.555	53842060	9
		U28	U28	158.745	11.44	128540656	22
		U31	U31	156.921	10.451	85721448	15
		U39	U39	158.806	10.82	84085784	15
		U40	U40	164.406	14.432	66162560	12
		U41	U41	164.292	12.96	52836588	9
		G42	G42	143.504	9.923	45416184	8
		G43	G43	148.223	12.433	52833772	9
		G44	G44	148.265	12.092	31919056	6
		G37	G37	149.201	12.994	37000700	6
		G38	G38	148.573	13.3	20685624	4
		G57	G57	147.762	12.283	154260816	27
		G59	G59	150.17	13.188	39331776	7
		U68	U68	163.654	14.058	216479344	38
		U70	U70	163.367	13.801	249439232	44
		U71	U71	163.291	13.12	111997096	20
		G81	G81	149.013	13.13	170077952	30
		U82	U82	163.824	14.216	79399168	14
		G115	G115	148.004	12.686	76210896	13
		U90	U90	162.69	13.768	93120488	16
		U91	U91	163.248	13.498	142662832	25
		U92	U92	162.804	12.8	96423760	17
		G110	G110	147.502	12.336	44220880	8
		G43holo	G43holo	148.082	12.377	20694472	4
		G46holo	G46holo	151.398	12.823	0	0
		U47holo	U47holo	159.494	10.739	0	1
		U49holo	U49holo	160.883	10.426	0	2
		G72holo	G72holo	148.543	11.44	0	2
		U75holo	U75holo	164.081	13.779	0	1
		G78holo	G78holo	147	11.49	0	2

## Sheet: Supplementary Figure 7
rS1 titration NMR
0 eq			Assignment	w1	w2	Data Height	S/N
		G14apoB
		U16apoB	U16apoB	162.848	13.801	74959968	26
		U17apoB	U17apoB	159.733	11.97	70593392	25
		G38apoB	G38apoB	148.571	12.541	63747516	22
		G44apoB	G44apoB	144.082	10.452	77223024	27
		G46apoB	G46apoB	149.536	13.536	76107240	27
		U47apoB	U47apoB	159.562	11.965	66297140	23
		G59apoB	G59apoB	148.883	13.163	46076500	16
			G72apoB	147.62	11.741	52713676	18
		U16	U16	163.888	14.035	104010576	36
		U17	U17	163.69	13.633	41958684	15
		U77	U77	162.847	13.235	53262324	19
		G78	G78	147.065	11.551	30699168	11
		U28	U28	158.739	11.44	86820800	30
		U31	U31	156.921	10.454	67309376	23
		U39	U39	158.799	10.821	57799300	20
		U40	U40	164.418	14.433	52554696	18
		U41	U41	164.189	12.957	37029884	13
		G42	G42	143.465	9.918	38616052	13
		G43	G43	148.232	12.427	47883004	17
		G44	G44	148.265	12.092	29531268	10
		G37	G37	149.185	13.003	29863700	10
		G38	G38	148.573	13.3	14657672	5
		G57	G57	147.762	12.283	142440304	50
		G59	G59	150.139	13.194	32498870	11
		U68	U68	163.654	14.058	195969200	68
		U70	U70	163.367	13.801	230013024	80
		U71	U71	163.28	13.128	104790904	37
		G81	G81	149.013	13.13	150914976	53
		U82	U82	163.824	14.216	73733416	26
		G115	G115	147.97	12.688	64380348	22
		U90	U90	162.69	13.768	69283208	24
		U91	U91	163.291	13.493	133476816	47
		U92	U92	162.802	12.802	82643624	29
		G110	G110	147.502	12.336	33930200	12
		G43holo	G43holo	148.082	12.377	18910260	7
		G46holo	G46holo	151.398	12.823	0	1
		U47holo	U47holo	159.494	10.739	0	1
		U49holo	U49holo	160.883	10.426	0	1
		G72holo	G72holo	148.543	11.44	0	3
		U75holo	U75holo	164.081	13.779	0	0
		G78holo	G78holo	147	11.49	0	3
1 eq
			Assignment	w1	w2	Data Height	S/N
		G14apoB
		U16apoB	U16apoB	162.848	13.801	114506352	20
		U17apoB	U17apoB	159.772	11.984	72347968	13
		G38apoB	G38apoB	148.629	12.541	81284912	14
		G44apoB	G44apoB	144.098	10.45	98413792	17
		G46apoB	G46apoB	149.544	13.532	101567008	18
		U47apoB	U47apoB	159.407	11.977	27664344	5
		G59apoB	G59apoB	148.883	13.163	42568440	7
			G72apoB	147.631	11.744	64710500	11
		U16	U16	163.888	14.035	116649784	20
		U17	U17	163.66	13.635	64238144	11
		U77	U77	162.887	13.239	86172136	15
		G78	G78	147.059	11.555	53842060	9
		U28	U28	158.745	11.44	128540656	22
		U31	U31	156.921	10.451	85721448	15
		U39	U39	158.806	10.82	84085784	15
		U40	U40	164.406	14.432	66162560	12
		U41	U41	164.292	12.96	52836588	9
		G42	G42	143.504	9.923	45416184	8
		G43	G43	148.223	12.433	52833772	9
		G44	G44	148.265	12.092	31919056	6
		G37	G37	149.201	12.994	37000700	6
		G38	G38	148.573	13.3	20685624	4
		G57	G57	147.762	12.283	154260816	27
		G59	G59	150.17	13.188	39331776	7
		U68	U68	163.654	14.058	216479344	38
		U70	U70	163.367	13.801	249439232	44
		U71	U71	163.291	13.12	111997096	20
		G81	G81	149.013	13.13	170077952	30
		U82	U82	163.824	14.216	79399168	14
		G115	G115	148.004	12.686	76210896	13
		U90	U90	162.69	13.768	93120488	16
		U91	U91	163.248	13.498	142662832	25
		U92	U92	162.804	12.8	96423760	17
		G110	G110	147.502	12.336	44220880	8
		G43holo	G43holo	148.082	12.377	20694472	4
		G46holo	G46holo	151.398	12.823	0	0
		U47holo	U47holo	159.494	10.739	0	1
		U49holo	U49holo	160.883	10.426	0	2
		G72holo	G72holo	148.543	11.44	0	2
		U75holo	U75holo	164.081	13.779	0	1
		G78holo	G78holo	147	11.49	0	2
2eq
			Assignment	w1	w2	Data Height	S/N
		G14apoB
		U16apoB	U16apoB	162.848	13.801	99435224	26
		U17apoB	U17apoB	159.772	11.984	50901760	13
		G38apoB	G38apoB	148.629	12.541	68239560	18
		G44apoB	G44apoB	144.067	10.452	86719912	23
		G46apoB	G46apoB	149.52	13.533	84352032	22
		U47apoB	U47apoB	159.407	11.977	22737124	6
		G59apoB	G59apoB	148.883	13.163	38766036	10
			G72apoB	147.62	11.741	27872108	7
		U16	U16	163.888	14.035	114025904	30
		U17	U17	163.721	13.637	48560848	13
		U77	U77	162.857	13.239	81643136	21
		G78	G78	147.065	11.551	32881434	9
		U28	U28	158.75	11.441	140005344	37
		U31	U31	156.946	10.453	96086168	25
		U39	U39	158.815	10.821	88561376	23
		U40	U40	164.406	14.432	77796336	20
		U41	U41	164.232	12.965	51313012	13
		G42	G42	143.446	9.919	57439672	15
		G43	G43	148.223	12.433	51486604	13
		G44	G44	148.265	12.092	45934208	12
		G37	G37	149.242	13	47332108	12
		G38	G38	148.573	13.3	28713490	8
		G57	G57	147.762	12.283	107315440	28
		G59	G59	150.148	13.192	51188956	13
		U68	U68	163.654	14.058	144166816	38
		U70	U70	163.367	13.801	196240096	51
		U71	U71	163.286	13.125	63593528	17
		G81	G81	149.013	13.13	107693256	28
		U82	U82	163.824	14.216	56987180	15
		G115	G115	148.004	12.686	31081326	8
		U90	U90	162.69	13.768	42724584	11
		U91	U91	163.286	13.496	89604880	23
		U92	U92	162.824	12.801	68965224	18
		G110	G110	147.658	12.321	62133552	16
		G43holo	G43holo	148.082	12.377	0	4
		G46holo	G46holo	151.398	12.823	0	2
		U47holo	U47holo	159.494	10.739	0	2
		U49holo	U49holo	160.883	10.426	0	3
		G72holo	G72holo	148.543	11.44	0	2
		U75holo	U75holo	164.081	13.779	0	1
		G78holo	G78holo	147	11.49	0	3
3 eq.
			Assignment	w1	w2	Data Height	S/N
		G14apoB
		U16apoB	U16apoB	162.848	13.801	76271680	14
		U17apoB	U17apoB	159.772	11.984	33148888	6
		G38apoB	G38apoB	148.629	12.541	0	4
		G44apoB	G44apoB	144.098	10.45	0	4
		G46apoB	G46apoB	149.602	13.53	34751464	6
		U47apoB	U47apoB	159.407	11.977	0	2
		G59apoB	G59apoB	148.883	13.163	0	3
			G72apoB	147.62	11.741	0	2
		U16	U16	163.888	14.035	64884452	12
		U17	U17	163.663	13.627	52026096	9
		U77	U77	162.851	13.241	58084168	10
		G78	G78	147.081	11.557	37439036	7
		U28	U28	158.737	11.44	95934872	17
		U31	U31	156.912	10.454	78274088	14
		U39	U39	158.851	10.823	68337472	12
		U40	U40	164.426	14.434	71002808	13
		U41	U41	164.183	12.965	40403328	7
		G42	G42	143.504	9.923	57818704	10
		G43	G43	148.223	12.433	32498052	6
		G44	G44	148.265	12.092	46548744	8
		G37	G37	149.242	13	0	4
		G38	G38	148.573	13.3	29117580	5
		G57	G57	147.799	12.289	50244080	9
		G59	G59	150.148	13.192	35638860	6
		U68	U68	163.654	14.058	69839696	12
		U70	U70	163.367	13.801	101862712	18
		U71	U71	163.181	13.096	25788782	5
		G81	G81	149.013	13.13	54441404	10
		U82	U82	163.824	14.216	0	3
		G115	G115	148.004	12.686	0	3
		U90	U90	162.69	13.768	29106568	5
		U91	U91	163.328	13.493	38398936	7
		U92	U92	162.758	12.794	0	4
		G110	G110	147.502	12.336	0	4
		G43holo	G43holo	148.082	12.377	0	2
		G46holo	G46holo	151.398	12.823	0	1
		U47holo	U47holo	159.494	10.739	0	0
		U49holo	U49holo	160.883	10.426	0	1
		G72holo	G72holo	148.543	11.44	0	0
		U75holo	U75holo	164.081	13.779	0	1
		G78holo	G78holo	147	11.49	0	0
4 eq
			Assignment	w1	w2	Data Height	S/N
	apo	G14apoB
		U16apoB	U16apoB	162.848	13.801	40824964	8
		U17apoB	U17apoB	159.772	11.984	0	2
		G38apoB	G38apoB	148.629	12.541	0	4
		G44apoB	G44apoB	144.098	10.45	23622016	5
		G46apoB	G46apoB	149.556	13.525	44915804	9
		U47apoB	U47apoB	159.407	11.977	0	1
		G59apoB	G59apoB	148.883	13.163	27180262	5
			G72apoB	147.631	11.744	0	4
	P1	U16	U16	163.888	14.035	68475752	14
		U17	U17	163.663	13.627	47849260	10
		U77	U77	162.827	13.236	55370680	11
		G78	G78	147.059	11.555	41860320	8
	P2	U28	U28	158.737	11.44	105213072	21
		U31	U31	156.912	10.454	71444256	14
		U39	U39	158.851	10.823	61718904	12
		U40	U40	164.41	14.431	79558048	16
		U41	U41	164.197	12.943	42383712	9
		G42	G42	143.504	9.923	61660432	12
		G43	G43	148.223	12.433	0	4
		G44	G44	148.265	12.092	58380768	12
	L/J	G37	G37	149.322	13.005	35763352	7
		G38	G38	148.573	13.3	0	4
	P3	G57	G57	147.762	12.283	39341688	8
		G59	G59	150.254	13.2	39188160	8
		U68	U68	163.654	14.058	48038496	10
		U70	U70	163.367	13.801	73333976	15
		U71	U71	163.181	13.096		3
	P4	G81	G81	149.013	13.13	30523918	6
		U82	U82	163.824	14.216	0	4
		G115	G115	148.004	12.686	0	4
	P5	U90	U90	162.69	13.768	0	1
		U91	U91	163.328	13.493	23730640	5
		U92	U92	162.758	12.794	0	1
		G110	G110	147.502	12.336	29414980	6
	holo	G43holo	G43holo	148.082	12.377	25175000	5
		G46holo	G46holo	151.398	12.823	0	1
		U47holo	U47holo	159.494	10.739	0	3
		U49holo	U49holo	160.883	10.426	0	4
		G72holo	G72holo	148.543	11.44	0	2
		U75holo	U75holo	164.081	13.779	0	2
		G78holo	G78holo	147	11.49	0	3
			Assignment	w1	w2	Data Height	S/N
	apo	G14apoB
		U16apoB	U16apoB	162.848	13.801	24344310	8
		U17apoB	U17apoB	159.772	11.984	0	3
		G38apoB	G38apoB	148.629	12.541	0	3
		G44apoB	G44apoB	144.098	10.45	0	1
		G46apoB	G46apoB	149.518	13.516	41516136	13
		U47apoB	U47apoB	159.407	11.977	0	2
		G59apoB	G59apoB	148.883	13.163	0	2
			G72apoB	147.631	11.744	0	3
	P1	U16	U16	163.888	14.035	46732272	15
		U17	U17	163.663	13.627	50250352	16
		U77	U77	162.83	13.227	56164024	18
		G78	G78	147.059	11.555	0	4
	P2	U28	U28	158.651	11.425	109094360	34
		U31	U31	156.972	10.515	89916872	28
		U39	U39	158.769	10.777	111972520	35
		U40	U40	164.431	14.425	96022288	30
		U41	U41	164.144	12.938	62081224	19
		G42	G42	143.539	9.933	76147152	24
		G43	G43	148.223	12.433	15576157	5
		G44	G44	148.201	12.086	56474016	18
	L/J	G37	G37	149.384	13.01	29132858	9
		G38	G38	148.573	13.3	0	3
	P3	G57	G57	147.762	12.283	19622616	6
		G59	G59	150.247	13.201	52200156	16
		U68	U68	163.654	14.058	27729236	9
		U70	U70	163.367	13.801	31521874	10
		U71	U71	163.181	13.096		4
	P4	G81	G81	149.013	13.13	25863852	8
		U82	U82	163.824	14.216	0	4
		G115	G115	148.004	12.686	0	2
	P5	U90	U90	162.69	13.768	0	2
		U91	U91	163.328	13.493	0	3
		U92	U92	162.758	12.794	0	1
		G110	G110	147.502	12.336	25095844	8
	holo	G43holo	G43holo	148.082	12.377	32966488	10
		G46holo	G46holo	151.398	12.823	30351914	10
		U47holo	U47holo	159.494	10.739	53156956	17
		U49holo	U49holo	160.883	10.426	34524696	11
		G72holo	G72holo	148.573	11.441	37411696	12
		U75holo	U75holo	164.081	13.779	30783292	10
		G78holo	G78holo	146.985	11.492	45353012	14
holo
1 eq.
			Assignment	w1	w2	Data Height	S/N
	apo	G38apoB	G38apoB	148.698	12.541	19196332	11
		G44apoB	G44apoB	144.074	10.447	19022232	11
		G46apoB	G46apoB	149.514	13.498	60357644	35
	P1	U16	U16	163.264	13.969	50892100	29
		U17	U17	163.602	13.59	118945584	68
		U20	U20	162.766	13.884	24288728	14
		U77	U75	164.055	13.784	81063848	46
		G78	G78	146.934	11.476	99729136	57
	P2	U25	U25	164.891	13.727	102828784	59
		U28	U28	158.613	11.416	223787968	128
		U31	U31	156.96	10.522	211113360	121
		U39	U39	158.765	10.771	224639584	129
		U40	U40	164.44	14.428	136090304	78
		U41	U41	164.123	12.938	116859328	67
		G42	G42	143.497	9.937	120907640	69
		G43	G43	148.043	12.372	97299200	56
		G44	G44	148.162	12.083	92799928	53
	L/J	U22	U22	163.957	13.224	47499132	27
		U34	U34	164.603	13.723	60619096	35
		G37	G37	149.326	13.011	56720588	33
		G38	G38	148.656	13.329	51511992	30
		G46	G46	151.461	12.826	51792612	30
		U47	U47	159.466	10.734	144632752	83
		U49	U49	160.854	10.416	110758016	64
		U51	U51	164.375	13.49	139010032	80
		U74	U74	163.527	14.025	84735184	49
		U75	U75	164.055	13.784	81063848	46
	P3	G57	G57	147.408	12.388	80348248	46
		G59	G59	150.261	13.206	78399112	45
		U68	U68	164.115	14.047	137432448	79
		U70	U70	163.212	13.881	106199632	61
		G72	G72	148.491	11.436	70619976	41
	P4	U82	U82	163.818	14.215	20246592	12
		G115	G115	147.977	12.678	19205692	11
	P5	U90	U90	163.175	13.796	75905440	44
		U91	U91	163.245	13.504	51663672	30
		U92	U92	162.765	12.8	37759732	22
		G110	G110	147.817	12.283	36015552	21
holo 1 eq.
			Assignment	w1	w2	Data Height	S/N
	apo	G38apoB	G38apoB	148.698	12.541	18780896	4
		G44apoB	G44apoB	144.074	10.447	22339148	4
		G46apoB	G46apoB	149.514	13.498	86552576	17
	P1	U16	U16	163.264	13.969	92339888	18
		U17	U17	163.609	13.594	153646576	30
		U20	U20	162.766	13.884	34691128	7
		U77	U77	162.798	13.211	152222352	29
		G78	G78	146.934	11.476	138445088	27
	P2	U25	U25	164.891	13.727	158586064	30
		U28	U28	158.613	11.416	320683744	62
		U31	U31	156.962	10.522	306001024	59
		U39	U39	158.772	10.772	328818720	63
		U40	U40	164.436	14.428	202910032	39
		U41	U41	164.12	12.939	158083328	30
		G42	G42	143.497	9.937	171026848	33
		G43	G43	148.043	12.372	145018816	28
		G44	G44	148.162	12.083	127482264	24
	L/J	U22	U22	163.979	13.226	85787888	16
		U34	U34	164.603	13.723	92277416	18
		G37	G37	149.305	13.013	85939112	17
		G38	G38	148.684	13.328	64497040	12
		G46	G46	151.452	12.823	72106912	14
		U47	U47	159.473	10.735	219813808	42
		U49	U49	160.845	10.417	153509568	29
		U51	U51	164.375	13.49	215373904	41
		U74	U74	163.527	14.025	117321040	23
		U75	U75	164.094	13.78	139506336	27
	P3	G57	G57	147.408	12.388	109101576	21
		G59	G59	150.226	13.204	113693984	22
		U68	U68	164.052	14.051	186064704	36
		U70	U70	163.212	13.881	157958336	30
		G72	G72	148.491	11.436	109825096	21
	P4	U82	U82	163.818	14.215	51118200	10
		G115	G115	147.963	12.686	25137910	5
	P5	U90	U90	163.175	13.796	132757672	26
		U91	U91	163.245	13.504	78632576	15
		U92	U92	162.765	12.8	65253488	13
		G110	G110	147.817	12.283	54599960	10
holo 2 eq.
			Assignment	w1	w2	Data Height	S/N
	apo	G38apoB	G38apoB	148.698	12.541	30756948	6
		G44apoB	G44apoB	144.071	10.452	27473212	5
		G46apoB	G46apoB	149.514	13.498	70888880	14
	P1	U16	U16	163.264	13.969	86526784	17
		U17	U17	163.607	13.597	140159984	28
		U20	U20	162.766	13.884	27051416	5
		U77	U77	162.785	13.208	132271920	26
		G78	G78	146.953	11.476	121171112	24
	P2	U25	U25	164.891	13.727	127831528	25
		U28	U28	158.631	11.415	275855744	55
		U31	U31	156.97	10.521	248073696	49
		U39	U39	158.765	10.771	265820608	53
		U40	U40	164.439	14.426	166735616	33
		U41	U41	164.123	12.938	151755072	30
		G42	G42	143.497	9.937	151865504	30
		G43	G43	148.043	12.372	120793608	24
		G44	G44	148.162	12.083	107155120	21
	L/J	U22	U22	163.957	13.224	62951624	13
		U34	U34	164.603	13.723	72204776	14
		G37	G37	149.312	13.011	77470152	15
		G38	G38	148.656	13.329	65751136	13
		G46	G46	151.479	12.828	60666192	12
		U47	U47	159.466	10.734	176814992	35
		U49	U49	160.859	10.418	135613440	27
		U51	U51	164.377	13.49	185594112	37
		U74	U74	163.527	14.025	96048912	19
		U75	U75	164.055	13.784	109357024	22
	P3	G57	G57	147.408	12.388	99654136	20
		G59	G59	150.266	13.205	94907600	19
		U68	U68	164.052	14.051	164766672	33
		U70	U70	163.212	13.881	122780488	24
		G72	G72	148.475	11.433	79787544	16
	P4	U82	U82	163.818	14.215	37601720	7
		G115	G115	147.977	12.678	24061844	5
	P5	U90	U90	163.175	13.796	102931568	20
		U91	U91	163.245	13.504	55657148	11
		U92	U92	162.765	12.8	55673432	11
		G110	G110	147.817	12.283	52592484	10
holo 3 eq.
			Assignment	w1	w2	Data Height	S/N
	apo	G38apoB	G38apoB	148.698	12.541	0	3
		G44apoB	G44apoB	144.074	10.447	0	2
		G46apoB	G46apoB	149.514	13.498	42671792	9
	P1	U16	U16	163.264	13.969	75451736	16
		U17	U17	163.602	13.603	97208776	20
		U20	U20	162.766	13.884	0	2
		U77	U77	162.789	13.217	77173856	16
		G78	G78	146.95	11.479	82313264	17
	P2	U25	U25	164.891	13.727	78268240	16
		U28	U28	158.625	11.415	183246144	39
		U31	U31	156.965	10.518	160228560	34
		U39	U39	158.77	10.771	167096416	35
		U40	U40	164.452	14.425	106114464	22
		U41	U41	164.128	12.936	77820408	16
		G42	G42	143.492	9.936	100629832	21
		G43	G43	148.027	12.374	82277584	17
		G44	G44	148.197	12.083	81492560	17
	L/J	U22	U22	163.983	13.224	45066504	9
		U34	U34	164.603	13.723	62173960	13
		G37	G37	149.271	13.011	46849812	10
		G38	G38	148.642	13.328	46346104	10
		G46	G46	151.485	12.822	33261698	7
		U47	U47	159.47	10.735	119449184	25
		U49	U49	160.868	10.418	84838704	18
		U51	U51	164.377	13.491	113940864	24
		U74	U74	163.527	14.025	59302360	12
		U75	U75	164.091	13.782	73489920	15
	P3	G57	G57	147.438	12.386	68493016	14
		G59	G59	150.25	13.206	63079336	13
		U68	U68	164.052	14.051	105656880	22
		U70	U70	163.212	13.881	72865072	15
		G72	G72	148.472	11.437	51487304	11
	P4	U82	U82	163.818	14.215	23316834	5
		G115	G115	147.977	12.678	0	3
	P5	U90	U90	163.175	13.796	53063128	11
		U91	U91	163.245	13.504	24248504	5
		U92	U92	162.765	12.8	31781864	7
		G110	G110	147.817	12.283	0	4
holo			Assignment	w1	w2	Data Height	S/N
4 eq
	apo	G38apoB	G38apoB?-?	148.698	12.541	0	1
		G44apoB	G44apoB?-?	144.074	10.447	0	1
		G46apoB	G46apoB?-?	149.514	13.498	36388532	7
	P1	U16	U16?-?	163.322	13.967	83847024	16
		U17	U17?-?	163.608	13.603	112383536	22
		U20	U20?-?	162.766	13.884	0	2
		U77	U77?-?	162.829	13.217	84696272	16
		G78	G78?-?	146.967	11.48	80220304	16
	P2	U25	U25?-?	164.985	13.724	85273808	17
		U28	U28?-?	158.634	11.417	185866096	36
		U31	U31?-?	156.977	10.523	178356976	35
		U39	U39?-?	158.774	10.772	181308848	35
		U40	U40?-?	164.462	14.426	117404536	23
		U41	U41?-?	164.136	12.941	102192952	20
		G42	G42?-?	143.497	9.937	103783568	20
		G43	G43?-?	148.071	12.374	74988328	15
		G44	G44?-?	148.184	12.085	80863992	16
	L/J	U22	U22?-?	163.997	13.226	44313868	9
		U34	U34?-?	164.603	13.723	46105264	9
		G37	G37?-?	149.349	13.014	47581900	9
		G38	G38?-?	148.671	13.33	39320348	8
		G46	G46?-?	151.454	12.828	40225996	8
		U47	U47?-?	159.475	10.738	120840608	23
		U49	U49?-?	160.878	10.42	72412912	14
		U51	U51?-?	164.379	13.493	136874560	27
		U74	U74?-?	163.527	14.025	63807036	12
		U75	U75?-?	164.055	13.784	76565984	15
	P3	G57	G57?-?	147.459	12.387	55525320	11
		G59	G59?-?	150.276	13.207	63804768	12
		U68	U68?-?	164.116	14.049	107018736	21
		U70	U70?-?	163.212	13.881	73891816	14
		G72	G72?-?	148.491	11.436	56165092	11
	P4	U82	U82?-?	163.818	14.215	0	2
		G115	G115?-?	147.977	12.678	0	0
	P5	U90	U90?-?	163.175	13.796	29687324	6
		U91	U91?-?	163.245	13.504	28956928	6
		U92	U92?-?	162.765	12.8	0	2
		G110	G110?-?	147.817	12.283	0	4
holo
5 eq.			Assignment	w1	w2	Data Height	S/N
	apo	G38apoB	G38apoB	148.698	12.541	0	1
		G44apoB	G44apoB	144.074	10.447	0	0
		G46apoB	G46apoB	149.514	13.498	40257984	13
	P1	U16	U16	163.342	13.961	83053952	27
		U17	U17	163.626	13.605	105527328	34
		U20	U20	162.766	13.884	16153572	5
		U77	U77	162.83	13.216	90458624	30
		G78	G78	146.973	11.48	84716024	28
	P2	U25	U25	164.891	13.727	83911200	27
		U28	U28	158.634	11.417	191375856	62
		U31	U31	156.979	10.522	176080640	57
		U39	U39	158.765	10.772	181778976	59
		U40	U40	164.48	14.427	127758688	42
		U41	U41	164.154	12.939	93285128	30
		G42	G42	143.497	9.937	93365128	30
		G43	G43	148.071	12.376	79482664	26
		G44	G44	148.196	12.085	75303152	25
	L/J	U22	U22	163.957	13.224	47133308	15
		U34	U34	164.603	13.723	39187532	13
		G37	G37	149.326	13.011	41787540	14
		G38	G38	148.616	13.329	51850304	17
		G46	G46	151.461	12.826	39150512	13
		U47	U47	159.492	10.737	123027760	40
		U49	U49	160.904	10.42	81930888	27
		U51	U51	164.396	13.493	124759696	41
		U74	U74	163.527	14.025	66798020	22
		U75	U75	164.055	13.784	83004800	27
	P3	G57	G57	147.444	12.39	63053616	21
		G59	G59	150.287	13.206	62797624	21
		U68	U68	164.151	14.048	114425864	37
		U70	U70	163.212	13.881	85076576	28
		G72	G72	148.516	11.434	51693528	17
	P4	U82	U82	163.818	14.215	0	2
		G115	G115	147.977	12.678	0	1
	P5	U90	U90	163.175	13.796	18885152	6
		U91	U91	163.245	13.504	0	1
		U92	U92	162.765	12.8	0	2
		G110	G110	147.817	12.283	0	0

## Sheet: Supplementary Figure 8a
		Another SDS-PAGE with Marker:

## Sheet: Supplementary Figure 8c
				20191016
				Another SDS-PAGE with Marker: (20190910)

## Sheet: Supplementary Figure 8e
									20180905

[truncated: 3 more sheets: Supplementary Figure 9, Supplementary Figure 10a, Supplementary Figure 10b]
